# Supplementary material
Source: publisher figshare collection journal article supplement (https://tandf.figshare.com/ndownloader/files/40915712)
Supplement: Supplementary file 1 [file 40915712]

## **Appendix 1**

The requirement for the biometric registration is a BVN (if available) and any of the following listed original/valid supporting documents.

1. Old National ID Card
2. Driver's License
3. Voter's card (Temporary or Permanent)
4. Nigerian International passport
5. Certificate of Origin (obtainable from any Local Government in Nigeria)
6. Attestation letter from a prominent ruler in your community
7. Birth certificate
8. Declaration of age
9. Attestation letter from religious/traditional leader
10. NHIS ID card
11. Government staff ID card
12. Registered/recognized private organization staff ID card
13. School ID Card (private/public)
14. Tax Clearance certificate
15. Valid immigration documents
16. Nigerian Commission for Refugees (NCFR) Refugee Certificate
17. Refugee ID card
18. Refugee Factsheet

## **Appendix 2**

Section 27 of the NIMC Act 2007. —(1) As from the date specified in that regard in regulations made by the Commission, the National Identification Number issued to a registered individual must be presented for the following transactions, that is:

- (c) application for, and issuance of a passport;
- (b) opening of individual and or personal bank accounts ;
- (c) purchase of insurance policies ;
- (d) subject to the provisions of the Land Use Act, the purchase, transfer and registration of land by any individual or any transaction connected therewith ;
- (e) such transactions pertaining to individuals as may be prescribed and regulated by the Pensions Reform Act, 2004;
- (f) such transactions specified under the Contributory Health Insurance Scheme;
- (g) such transactions that have social security implications;
- (h) all consumer credit transactions ;
- (i) registration of voters;
- (j) payment of taxes;
- (k) such relevant government services

Source: National Identity Management Commission (NIMC) Act 20007. Abuja: Federal Government of Nigeria. <https://lawpadi.com/wp-content/uploads/2015/08/5771.pdf>
